# Supplementary material for: Identifying resonant frequencies of viruses for microwave-based detection and inactivation of pathogenic viruses
Source: Springer Nature journal article supplement (doi:10.1038/s41598-025-27669-4), 2025-11-28
Supplement: MOESM1 [file 41598_2025_27669_MOESM1_ESM.pdf]

## *Supplementary Information*

### **Identifying Resonant Frequencies of Viruses for Microwave-Based Detection and Inactivation of Pathogenic Viruses**

Zhifeng Kuang<sup>1,2,✉</sup>, John Luginsland<sup>3</sup>, Chia-Suei Hung<sup>1</sup>, Blake W. Stamps<sup>1</sup>,

Robert J. Thomas<sup>4</sup>, Nancy Kelley-Loughnane<sup>1</sup>, Oscar N. Ruiz<sup>1</sup>, and William P. Roach<sup>5,✉</sup>

<sup>1</sup> Biomaterials Branch, Photonic, Electronic, and Soft Materials Division, Materials and Manufacturing Directorate, Air Force Research Laboratory, Wright-Patterson Air Force Base, OH 45433, United States

<sup>2</sup> UES Inc., a BlueHalo company, 4401 Dayton-Xenia Road, Dayton, OH 45432, United States

<sup>3</sup> Air Force Research Laboratory Strategic Partnering, Wright-Patterson AFB, OH 45431, United States

<sup>4</sup> 711th Human Performance Wing, Air Force Research Laboratory, JBSA Fort Sam Houston, TX 78234, United States

<sup>5</sup> Air Force Office of Scientific Research, Arlington, VA 22203, United States

✉ Correspondence: [Zhifeng Kuang <zig.kuang@gmail.com>](mailto:zig.kuang@gmail.com),

[William P. Roach <william.roach.4@us.af.mil>](mailto:william.roach.4@us.af.mil)

Supplementary Figures S1-S7 and Tcl script for calculating dipole moments

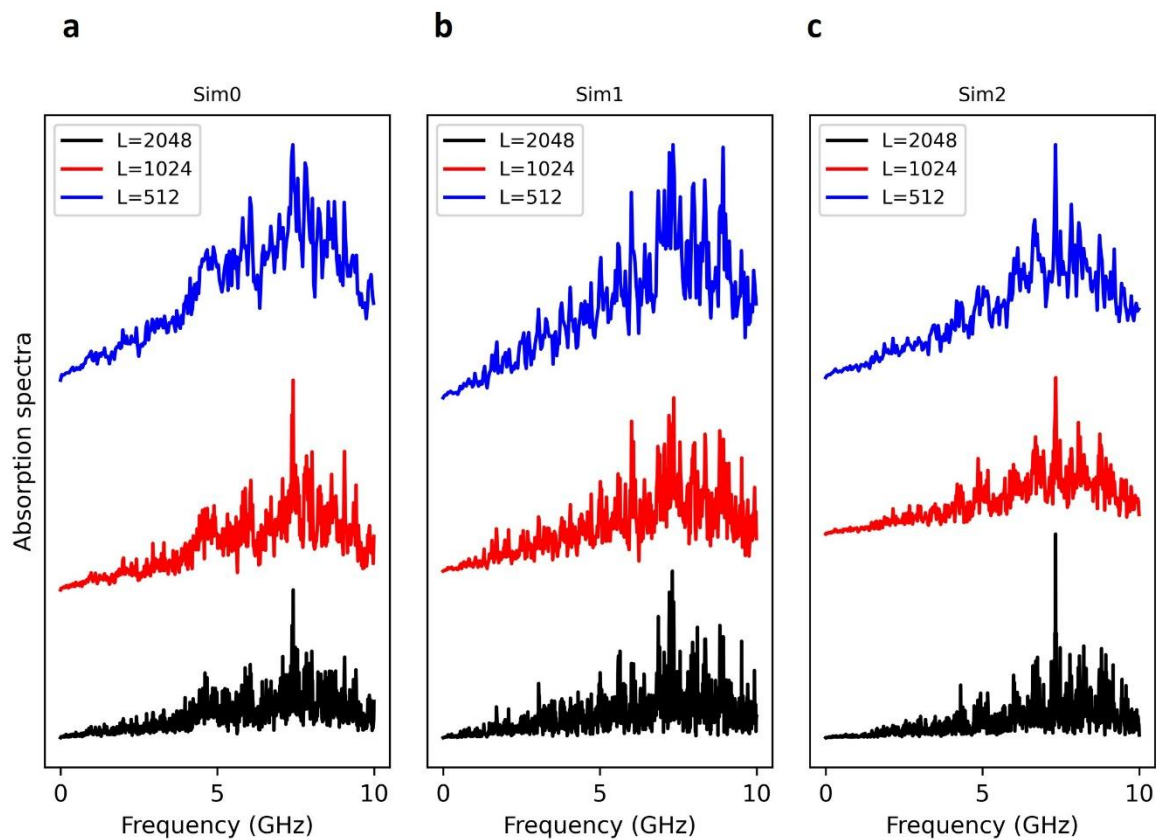

**Figure S1. Choice of segment length  $L$ .** We have calculated the absorption spectra for the segment length composing of  $2^9$  to  $2^{11}$  sequential samples for Sim0, Sim1, and Sim2, respectively. Although all spectra show a peak around 7.5 GHz, a good balance between resolution and variance is achieved at  $L = 2048$ . The frequency resolution achieved at  $L = 2048$  is 9.765625 MHz.

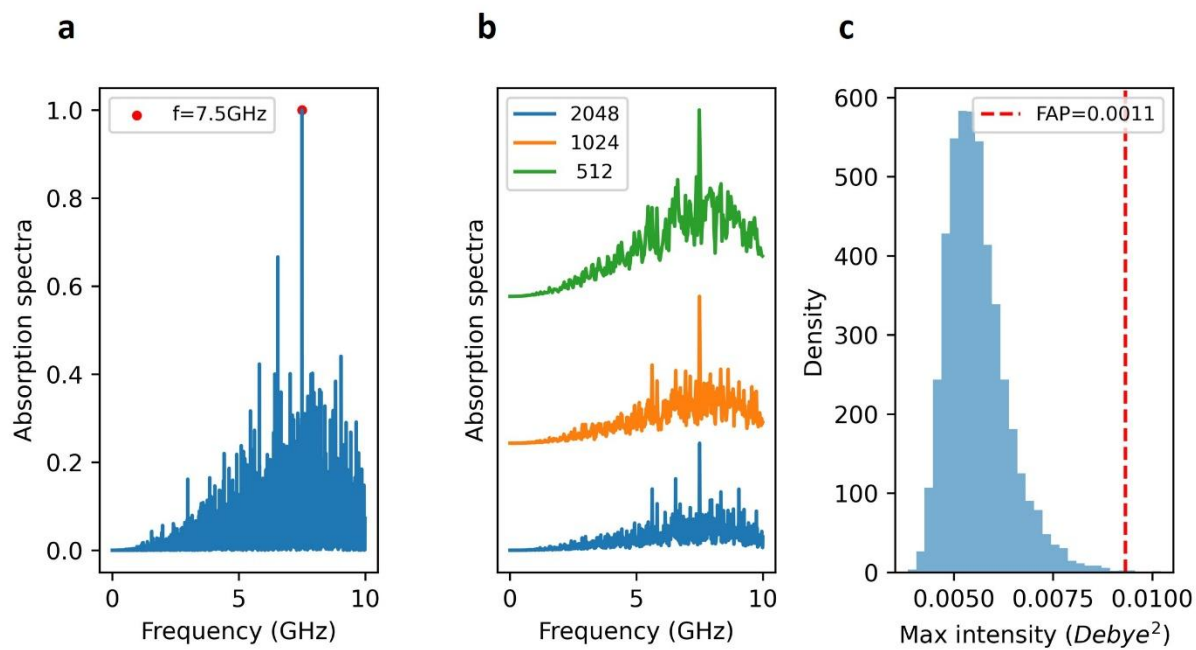

**Figure S2. Test of computational methods.** Setting random seed using `numpy.random.seed(seed=54321)`, a cosine wave with a frequency at 7.5 GHz is clearly revealed with FAP 0.11% using only 6500 data points.

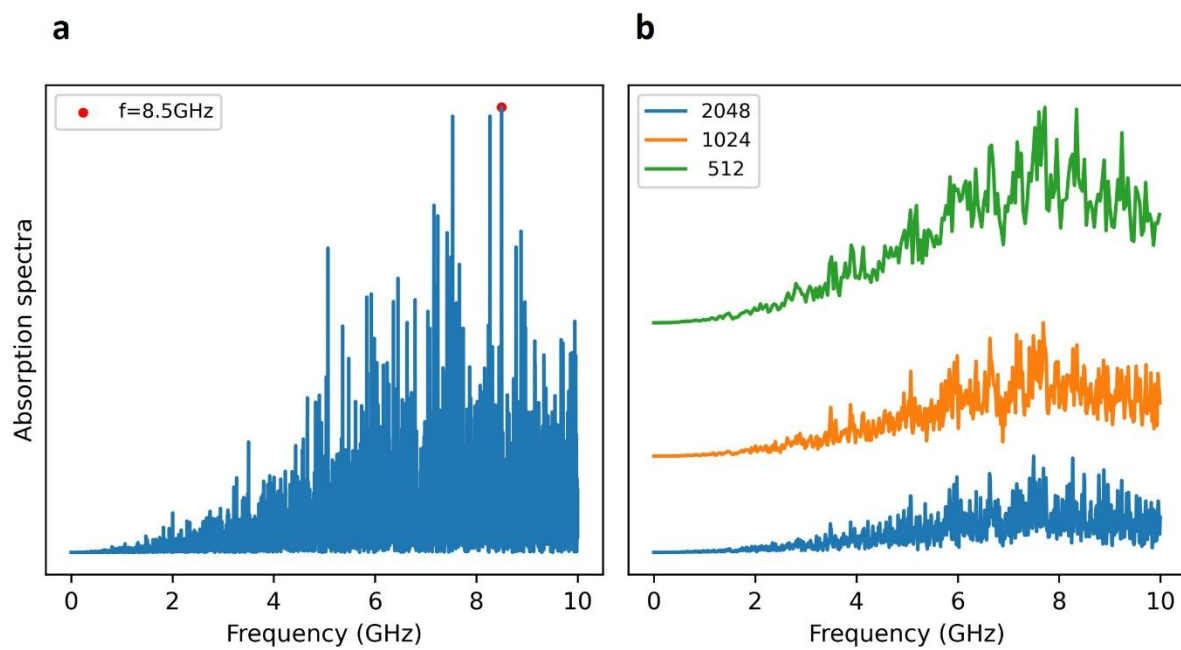

**Figure S3. Test of computational methods.** Setting random seed using `numpy.random.seed(seed=12345)`, a cosine wave with a frequency at 7.5 GHz is unobservable using only 6500 data points.

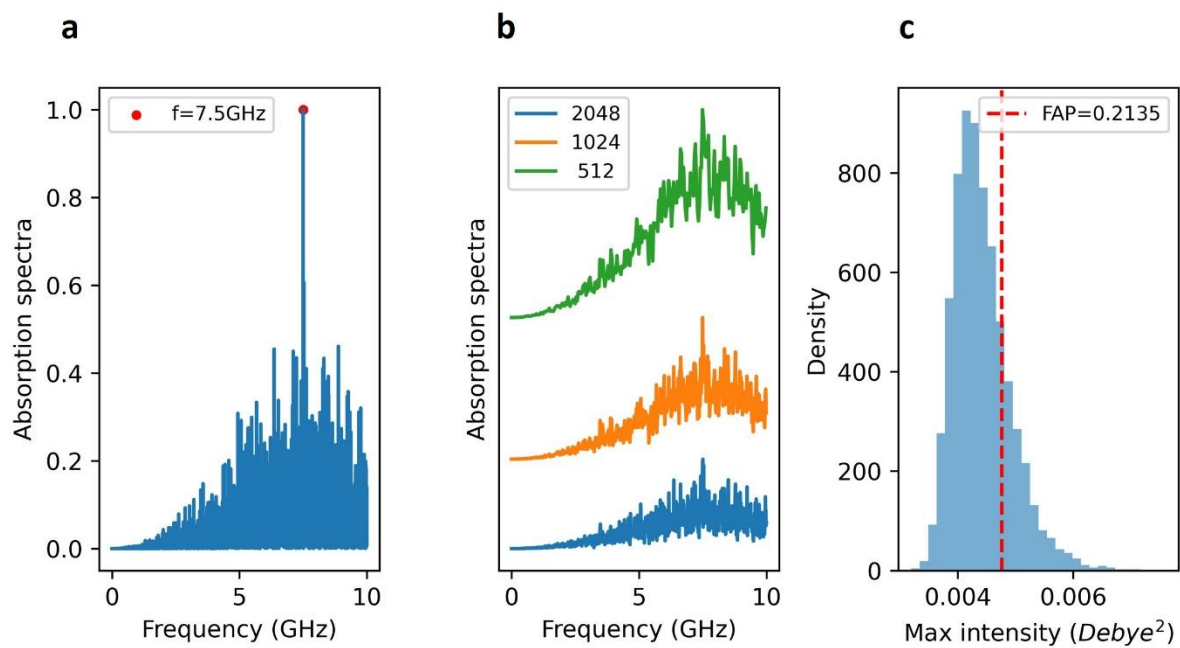

**Figure S4. Test of computational methods.** Setting random seed using `numpy.random.seed(seed=12345)`, a cosine wave with a frequency at 7.5 GHz is observable with FAP 21.35% using 11000 data points.

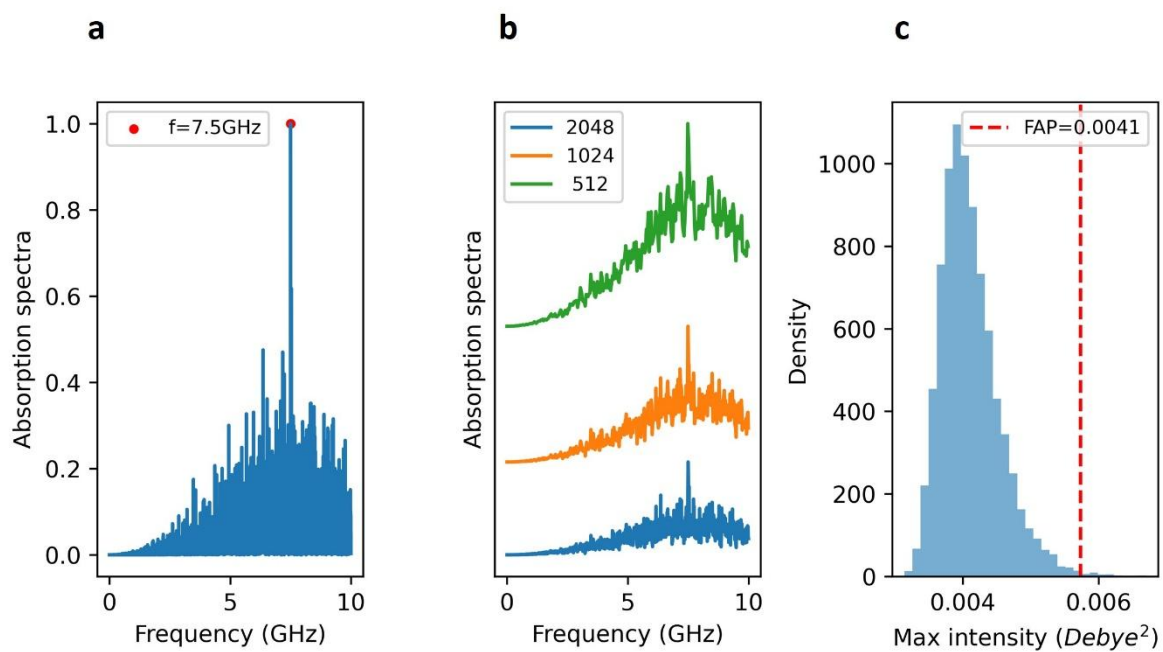

**Figure S5. Test of computational methods.** Setting random seed using `numpy.random.seed(seed=12345)`, a cosine wave with a frequency at 7.5 GHz is observable with FAP 0.41% using 13000 data points.

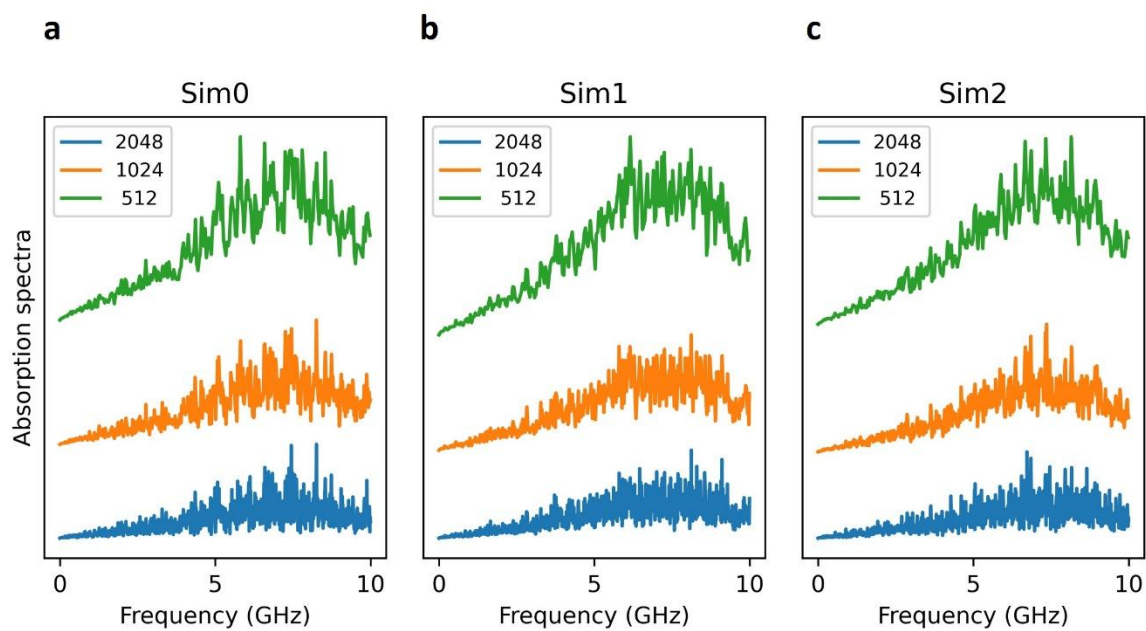

**Figure S6. Localized dipole moment analysis for the S1 domain.** We have recalculated the absorption spectra after selecting the S1 subunit of S protein. No significant peaks are observed in the S1 domain.

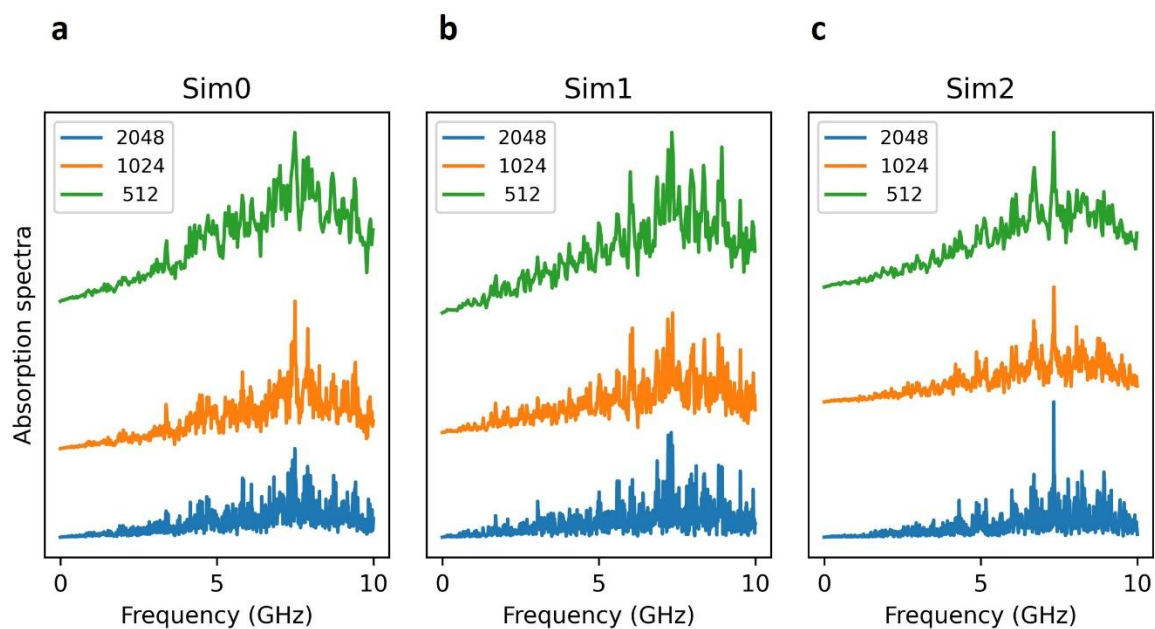

**Figure S7. Localized dipole moment analysis for the S2 domain.** We have recalculated the absorption spectra after selecting the S2 subunit of S protein. A peak around 7.5 GHz is clearly seen in all three simulations Sim0, Sim1, and Sim2. This implies that S2 makes dominant contribution to the global dipole moment fluctuations, which is in agreement with experimentally observed flexibility of the S2 domain.



## **# Tcl script for calculating dipole moments**

## load trajectory and packages

cd /p/work1/kuangz/SARS\_charmgui/ps50\_npt\_0

mol new com.psf type psf waitfor all

mol addfile ps50.dcd type dcd waitfor all

package require pbctools

pbc readxst prod1.restart.xsc

## open output files for dipole moments and radius of gyration

### full S protein

set DipoleS pbcDipoleS.dat

set DipoleSID [open \$DipoleS w]

set RgyrS pbcRgyrS.dat

set RgyrSID [open \$RgyrS w]

### S1 subunit

set DipoleS1 pbcDipoleS1.dat

set DipoleS1ID [open \$DipoleS1 w]

set RgyrS1 pbcRgyrS1.dat

set RgyrS1ID [open \$RgyrS1 w]

### S2 subunit

set DipoleS2 pbcDipoleS2.dat

set DipoleS2ID [open \$DipoleS2 w]

set RgyrS2 pbcRgyrS2.dat

set RgyrS2ID [open \$RgyrS2 w]

## loop all trajectory

set n [molinfo top get numframes]

for { set i 0 } { \$i < \$n } { incr i } {

```

#### update snapshot and wrap protein back to COM

animate goto $i

display update ui

pbc wrap -now -centersel "not (water or ions or segname MEMB)" -center com -compound
residue

pbc wrap -now -centersel "not (water or ions or segname MEMB)" -center com -compound
residue

pbc wrap -now -centersel "not (water or ions or segname MEMB)" -center com -compound
residue

#### select atoms

set prt [atomselect top "not (water or ions or segname MEMB)" frame $i]

set S1 [atomselect top "(same segname as (within 1.6 of ((resid 1 to 685) and protein))) and
(not (water or ions or segname MEMB or (protein and resid 686 to 1273) ))"]

set S2 [atomselect top "(same segname as (within 1.6 of ((resid 686 to 1273) and protein)))
and (not (water or ions or segname MEMB or (protein and resid 1 to 685) ))"]

#### calculate dipole moments and radius of gyration

puts $DipoleSID "[measure dipole $prt -debye -masscenter]"

puts $RgyrSID "[measure rgyr $prt weight mass]"

puts $DipoleS1ID "[measure dipole $S1 -debye -masscenter]"

puts $RgyrS1ID "[measure rgyr $S1 weight mass]"

puts $DipoleS2ID "[measure dipole $S2 -debye -masscenter]"

puts $RgyrS2ID "[measure rgyr $S2 weight mass]"

}

## close files

close $DipoleSID

close $RgyrSID

close $DipoleS1ID

```

close \$RgyrS1ID

close \$DipoleS2ID

close \$RgyrS2ID

exit
